# Supplementary material for: Laboratory analysis of positive rate of Mycoplasma pneumoniae antibody among 53,273 children with respiratory tract infections in Xi’an from 2017 to 2020
Source: PubMed Central journal article supplement — Transl Pediatr. 2022 May;11(5):625–30. doi: 10.21037/tp-22-127 (PMC9173883; doi:10.21037/tp-22-127), 2022-05
Supplement: tp-11-05-625-dss.pdf [file tp-11-05-625-dss.pdf]

## Data Sharing Statement

|                     |                                                                                                                                                     |                                                                                                                  |
|---------------------|-----------------------------------------------------------------------------------------------------------------------------------------------------|------------------------------------------------------------------------------------------------------------------|
| <b>Article Info</b> | <a href="https://dx.doi.org/10.21037/tp-22-127">https://dx.doi.org/10.21037/tp-22-127</a>                                                           |                                                                                                                  |
| <b>Item</b>         | <b>Question</b>                                                                                                                                     | <b>Authors' Response<br/>(place "-" if not applicable)</b>                                                       |
| 1                   | Would you like to share data collected for your study to others?                                                                                    | Yes.                                                                                                             |
| 2                   | If not, would you like to share the reason for your decision?                                                                                       |                                                                                                                  |
| 3                   | What data in particular will be shared?                                                                                                             | All data.                                                                                                        |
| 4                   | Any other documents will be shared? Such as study protocol, statistical analysis plan, informed consent form, clinical study report, analytic code. | Study protocol and statistical analysis plan will be shared if requested.                                        |
| 5                   | When will data availability begin?                                                                                                                  | From the publication date.                                                                                       |
| 6                   | When will data availability end?                                                                                                                    | Two years within the publication date, since the technique or survival data may be updated over time.            |
| 7                   | To whom will you share the data?                                                                                                                    | Doctors or scholars interested in the study of <i>Mycoplasma pneumoniae</i> .                                    |
| 8                   | For what type of analysis or purpose?                                                                                                               | For analysis to evaluate the characteristics of MP infection.                                                    |
| 9                   | How or where can the data/documents be obtained?                                                                                                    | Emails could be sent to the address below to obtain the shared data: xieyunhero@sina.com.                        |
| 10                  | Any other restrictions?                                                                                                                             | We may balance the potential benefits and risks for each request and then provide the data that could be shared. |
